# Supplementary material for: A reactivity model for oxidative addition to palladium enables quantitative predictions for catalytic cross-coupling reactions
Source: Royal Society of Chemistry journal article supplement (doi:10.1039/d2sc00174h), 2022-01-01
Supplement: d2sc00174h3.csv [file d2sc00174h3.csv]

SMILES	Measured deltaG	ESP1	ESP2	A1+A2	IBSI	pKa
BrC1=CC=C([N+]([O-])=O)C=N1	0.00	98.66	-19.70	0.000	0.2307	-4.4
BrC1=CC=C(C#N)C=N1	0.35	90.68	-24.54	0.000	0.2293	-4.4
BrC1=C(C#N)C=CC=N1	2.99	88.83	-30.06	0.837	0.2314	-4.4
BrC1=CC=C(C(F)(F)F)C=N1	3.34	74.39	-40.40	0.000	0.2273	-4.4
BrC1=CC=C(Cl)C=N1	8.43	55.96	-53.79	0.000	0.2233	-4.4
BrC1=CC=CC(Cl)=N1	8.59	57.61	-51.67	2.218	0.2256	-4.4
BrC1=CC=NC(C#N)=C1	8.84	98.14	86.64	0.000	0.2364	-4.4
BrC1=CC=C(F)C=N1	12.84	52.36	-55.90	0.000	0.2228	-4.4
BrC1=CC=CC=N1	13.26	35.52	-76.23	0.000	0.2205	-4.4
BrC1=C(C(F)(F)F)C=CC=N1	13.64	74.41	-45.46	10.460	0.2219	-4.4
ClC1=CC(Br)=CC=N1	13.79	68.43	52.92	0.000	0.2301	-4.4
BrC1=C(OC)C=CC=N1	14.87	34.40	-77.97	3.138	0.2235	-4.4
BrC1=CC=C([N+]([O-])=O)C=C1	15.47	72.67	61.62	0.000	0.2320	-4.4
BrC1=CC=C(C)C=N1	15.87	24.37	-83.97	0.000	0.2217	-4.4
BrC1=CN=CN=C1	16.62	77.07	79.11	0.000	0.2388	-4.4
BrC1=CC(C(F)(F)F)=CC(C(F)(F)F)=C1	18.11	81.76	82.03	0.000	0.2350	-4.4
BrC1=CC=C(OC)C=N1	18.84	19.06	-85.68	0.000	0.2174	-4.4
BrC1=CC=C(C#N)C=C1	20.60	67.92	57.77	0.000	0.2344	-4.4
BrC1=CC(Cl)=CC(Cl)=C1	21.33	51.32	43.57	0.000	0.2309	-4.4
BrC1=CC=C(C(C)=O)C=C1	24.59	38.04	22.52	0.000	0.2321	-4.4
BrC1=CC=C(C(F)(F)F)C=C1	26.26	48.63	38.70	0.000	0.2332	-4.4
BrC1=CC=CN=C1	27.34	41.77	34.99	0.000	0.2336	-4.4
BrC1=CC(OC)=CC(F)=C1	31.36	28.07	19.92	0.000	0.2331	-4.4
CC1=C(Br)C=C(C#N)C=C1	32.92	57.46	50.70	7.280	0.2336	-4.4
BrC1=CC=CC=C1	34.36	8.66	-1.26	0.000	0.2293	-4.4
BrC1=CC=C(F)C=C1	34.56	24.81	20.44	0.000	0.2297	-4.4
BrC1=CC=C(C)C=C1	35.96	-0.31	-8.98	0.000	0.2306	-4.4
BrC1=C(C(F)(F)F)C=C(OC)C=C1	36.35	28.27	22.86	10.460	0.2317	-4.4
BrC1=CC=C(OC)C=C1	37.32	-4.71	-10.51	0.000	0.2200	-4.4
BrC1=C(C)C=CC=C1	37.39	4.24	-9.73	7.280	0.2262	-4.4
BrC1=CC(C)=C(C)C=C1	38.45	-13.89	-24.98	0.000	0.2245	-4.4
BrC1=C(OC)C=C(OC)C=C1	41.13	-3.38	-12.22	3.138	0.2291	-4.4
ClC1=CC=C([N+]([O-])=O)C=N1	3.85	105.02	-22.70	0.000	0.3030	0.2
ClC1=CC=C(C#N)C=N1	8.34	96.68	-27.77	0.000	0.3036	0.2
ClC1=CC([N+]([O-])=O)=CC=N1	9.14	97.95	-25.61	0.000	0.2985	0.2
ClC1=C(C#N)C=CC=N1	10.44	95.86	-31.21	0.837	0.3044	0.2
ClC1=CC(C#N)=CC=N1	11.29	91.93	-31.34	0.000	0.3047	0.2
ClC1=CC=C(C(F)(F)F)C=N1	13.93	80.54	-43.85	0.000	0.2878	0.2
ClC1=CC=CC(C#N)=N1	14.81	91.91	-28.07	0.837	0.3011	0.2
ClC1=CC=NC(C)=N1	16.57	67.99	-54.14	7.280	0.2989	0.2
ClC1=C(F)C=CC=N1	19.00	61.00	-62.01	1.046	0.3017	0.2
ClC1=CC(Cl)=CC=N1	20.98	60.21	-62.71	0.000	0.3058	0.2
ClC1=C(Cl)C=CC=N1	22.16	60.04	-61.38	2.218	0.3026	0.2
ClC1=C(F)C=C(C)C=N1	22.96	49.92	-70.75	1.046	0.2999	0.2
ClC1=CC(C(F)(F)F)=CC(C)=N1	23.35	66.41	-47.84	7.280	0.2961	0.2
ClC1=CC=CC(Cl)=N1	23.79	62.55	-54.77	2.218	0.2953	0.2
ClC1=CC=C(Cl)C=N1	23.87	60.38	-57.74	0.000	0.2937	0.2
ClC1=CC(F)=CC=N1	24.00	58.99	-64.98	0.000	0.2937	0.2
ClC1=C(C#N)C(C)=CC(C)=N1	24.28	74.39	-46.45	8.117	0.3059	0.2
ClC1=C(OC)C=CC=N1	25.39	35.31	-88.28	3.138	0.2872	0.2
ClC1=C(C(F)(F)F)C=CC=N1	26.10	77.18	-46.99	10.460	0.2997	0.2
ClC1=CC=CC(C(F)(F)F)=N1	27.37	77.82	-44.14	10.460	0.2836	0.2
ClC1=CC(C(F)(F)F)=NC2=CC=CC=C21	28.51	75.27	61.74	0.000	0.3123	0.2
ClC1=CC=CC=N1	28.70	38.82	-79.83	0.000	0.2928	0.2
ClC1=CC=CC(F)=N1	29.12	61.37	-56.03	1.046	0.2959	0.2
ClC1=CC=C(F)C=N1	29.76	56.15	-59.58	0.000	0.2925	0.2
ClC1=CC=NC(C(F)(F)F)=C1	30.69	88.14	71.90	0.000	0.3107	0.2
ClC1=C(N)C=CC=N1	30.91	23.38	-96.82	5.146	0.2850	0.2
ClC1=CC(N2CCCCC2)=NC=N1	30.98	25.31	-104.27	0.000	0.2771	0.2
ClC1=CC(C)=CC=N1	31.36	28.98	-90.60	0.000	0.2965	0.2
ClC1=CC(OC)=CC=N1	31.78	27.66	-96.65	0.000	0.2870	0.2
ClC1=CC(N2CCCC2)=NC=N1	32.05	22.64	-106.40	0.000	0.2879	0.2
ClC1=CC=C(C)C=N1	32.25	27.60	-87.93	0.000	0.2964	0.2
ClC1=CC=NC(C(NC)=O)=C1	34.46	68.47	48.62	0.000	0.3111	0.2
ClC1=CC=CC(C)=N1	34.48	29.53	-82.06	7.280	0.2954	0.2
ClC1=CC=C(OC)C=N1	35.78	24.23	-86.19	0.000	0.2870	0.2
ClC1=C(C)C=CC=N1	36.45	34.38	-88.44	7.280	0.2983	0.2
ClC1=CC=CC(N)=N1	40.80	12.77	-83.66	5.146	0.2917	0.2
ClC1=CC(N)=CC=N1	41.41	6.43	-116.12	0.000	0.2860	0.2
ClC1=CC=C(N)C=N1	42.55	10.42	-97.48	0.000	0.2933	0.2
O=S(OC1=CC=C([N+]([O-])=O)C=C1)(C(F)(F)F)=O	4.00	113.20	78.16	0.000	0.4237	-11.3
O=S(OC1=CC=C(C#N)C=C1)(C(F)(F)F)=O	8.54	105.49	72.19	0.000	0.4092	-11.3
CC(C1=CC=C(OS(=O)(C(F)(F)F)=O)C=C1)=O	12.87	77.54	39.48	0.000	0.4387	-11.3
BrC1=CC=C(OS(=O)(C(F)(F)F)=O)C=C1	17.50	72.37	42.31	0.000	0.4158	-11.3
O=S(OC1=CC=CC=C1)(C(F)(F)F)=O	23.40	51.12	19.64	0.000	0.4007	-11.3
CC1=CC=C(OS(=O)(C(F)(F)F)=O)C=C1	25.61	41.30	11.80	0.000	0.3998	-11.3
O=S(OC1=CC=C(OC)C=C1)(C(F)(F)F)=O	27.45	36.53	12.29	0.000	0.4131	-11.3
CC(NC1=CC=C(OS(=O)(C(F)(F)F)=O)C=C1)=O	27.95	43.76	11.42	0.000	0.4119	-11.3
O=C(OC(C)(C)C)NC1=CC=C(OS(=O)(C(F)(F)F)=O)C=C1	26.93	42.61	14.77	0.000	0.3927	-11.3
